# Supplementary material
Source: PubMed Central journal article supplement (PMC7755729)
Supplement: NIHMS1640119-supplement-1.pdf [file NIHMS1640119-supplement-1.pdf]

# Effects of Diet-Modulated Autologous Fecal Microbiota Transplantation on Weight Regain

Ehud Rinott\* BSc<sup>1</sup>, Ilan Youngster\* MD<sup>2,3</sup>, Anat Yaskolka Meir MPH<sup>1</sup>, Gal Tsaban MD<sup>1</sup>, Hila Zelicha MPH<sup>1</sup>, Alon Kaplan BSc<sup>1</sup>, Dan Knights PhD<sup>4,5</sup>, Kieran Tuohy PhD<sup>6</sup>, Francesca Fava PhD<sup>6</sup>, Matthias Uwe Scholz PhD<sup>6</sup>, Oren Ziv PhD<sup>7</sup>, Elad Reuven BSc<sup>7</sup>, Amir Tirosh MD<sup>8,9</sup>, Assaf Rudich PhD<sup>1</sup>, Matthias Blüher MD<sup>10</sup>, Michael Stumvoll MD<sup>10</sup>, Uta Ceglarek PhD<sup>10</sup>, Karine Clement PhD<sup>11</sup>, Omry Koren PhD<sup>7</sup>, Dong D. Wang ScD<sup>12</sup>, Frank B. Hu PhD<sup>12,13</sup>, Meir J Stampfer DrPH<sup>12,13</sup>, Iris Shai PhD<sup>1,14</sup>

\*Both authors contributed equally to the manuscript

<sup>1</sup> Faculty of Health Sciences, Ben-Gurion University of the Negev, Beer-Sheva, Israel

<sup>2</sup> Pediatric Division and Center for Microbiome Research, Shamir Medical Center, Be'er Ya'akov, Israel

<sup>3</sup> Sackler School of Medicine, Tel-Aviv University, Tel-Aviv, Israel

<sup>4</sup> BioTechnology Institute, University of Minnesota; Saint Paul, MN 55108, USA

<sup>5</sup> Department of Computer Science and Engineering, University of Minnesota, Minneapolis, MN 55455, USA

<sup>6</sup> Department of Food Quality and Nutrition, Research and Innovation Centre, Fondazione Edmund Mach, Via E. Mach 1, San Michele all'Adige, Trento 38016. Italy.

<sup>7</sup> Azrieli Faculty of Medicine, Bar Ilan University, Safed, Israel

<sup>8</sup> Division of Endocrinology, Diabetes and Metabolism, Sheba Medical Center, Tel-Hashomer, Israel; and Sackler School of Medicine, Tel-Aviv University, Tel-Aviv, Israel

<sup>9</sup> Division of Endocrinology, Diabetes, and Hypertension, Brigham and Women's Hospital, Harvard Medical School, Boston, MA

<sup>10</sup> Department of Medicine, University of Leipzig, German

<sup>11</sup> Sorbonne University/Inserm, NutriOmics research Unit, Nutrition department, Pitié-Salpêtrière hospital, Assistance-publique Hopitaux de Paris, 75013, Paris, France

<sup>12</sup> Harvard T.H. Chan School of Public Health

<sup>13</sup> Channing Division of Network Medicine, Department of Medicine, Harvard Medical School and Brigham and Women's Hospital, Boston, MA, USA

<sup>14</sup> Adjunct Faculty, Harvard T.H. Chan School of Public Health

Correspondence to:

Iris Shai, RD, PhD. Department of Public Health, Faculty of Health Sciences, Ben-Gurion University of the Negev, P.O. Adjunct Faculty, Harvard T.H. Chan School of Public Health. Box 653, Beer-Sheva 84105, Israel; Phone: ++972-8-647-7449/3, Fax: ++972-8-647-7637/8, E-mail: [irish@bgu.ac.il](mailto:irish@bgu.ac.il)

Ilan Youngster, MD, MMSc. Pediatric Infectious Diseases Unit and the Center for Microbiome Research, Shamir Medical Center, Zerifin 70300, Israel; Phone: +972-506301191 Fax: +972-89779136, E-mail: [youngsteri@shamir.gov.il](mailto:youngsteri@shamir.gov.il)

## Table of contents

1. Inclusion and exclusion criteria
2. Lifestyle intervention description and outline, aFMT and placebo capsules processing, blood sample analysis
3. Metagenomics analysis BoosterShot pipeline, 16s rRNA sequencing pipeline
4. Multiple imputations for missing follow-up data, sample size calculation, randomization protocol and allocation sequence.
5. Table S1: Chronic Pharmacotherapy of the participants at baseline
6. Table S2: Characteristics of the study population at time 14-month
7. Table S3: Adherence to diet and physical activity at time 6-month
8. Table S4: Adherence to diet and physical activity, across lifestyle intervention arms and treatment groups, at the end of the trial
9. Figure S1: aFMT effect on 6-14 months changes in HOMA-IR, across lifestyle intervention
10. Figure S2: 0 to 6-months species changes across lifestyle intervention arms
11. Figure S3: 0 to 6-months KEGG modules changes across lifestyle intervention arms
12. Figure S4: Shotgun metagenomics processing validation against MetaPhlan2
13. Figure S5: Microbiome taxonomic and functional changes – centered-log-transformed data
14. Figure S6: Microbiome taxonomic and functional changes – excluding subjects with prescribed metformin

## **Supplementary 1. Inclusion and exclusion criteria**

### **Inclusion criteria:**

- Age above 30 years
  - - Waist circumference above 102 cm in men and 88 cm in women.
- Or**
- dyslipidemia (TG>150 and HDL-c≤40 for men; ≤50 for women)

### **Exclusion criteria:**

- Inability to perform physical activity
- Serum creatinine≥2 mg/dL
- Serum ALT or AST greater than 3 times above upper-limit-norm
- Major illness that might require hospitalization
- Pregnancy or lactation
- Active cancer, or chemotherapy treatment in the last 3 years
- Warfarin treatment
- Pacemaker
- Participation in a different trial

## **Supplementary 2. Sample size calculation**

Minimal required sample size was estimated based on the weight loss pattern in our previous CENTRAL trial.<sup>1</sup> Aiming to detect a complete attenuation of the expected 3±4.3kg weight regain, for an alpha of 5% and power of 90%, the calculated sample size was 88 subjects in total.

## **Supplementary 3. Randomization protocol and allocation sequence**

Recruitment to the DIRECT PLUS and aFMT trial was performed by ER, AYM, HZ, AK, and GT. All eligible participants who signed consent to participate in the trial and completed the baseline measurements were randomized into one of the three intervention groups (Healthy dietary guidance, Mediterranean, green-Mediterranean) at a 1:1:1 ratio and within strata of gender and work status (to ensure equal workplace-related lifestyle features between groups).

Participants reducing >3.5% body-weight, without prescribed antibiotics 2 months prior to feces sampling who agreed to participate were randomized in 1:1 ratio to two treatment groups (aFMT and placebo) within strata of gender and lifestyle intervention group.

Randomization was conducted in a single phase using an ad-hoc R-based procedure, the randomization was done by Nirit Keren from the Center for Microbiome Research at Shamir Medical Center, Israel.

#### Supplementary 4. Lifestyle intervention

All trial participants received free gym memberships and educational sessions, and were encouraged to engage in moderate intensity physical activity, ~80% of which included an aerobic component. The aerobic effort increased gradually, starting with 20 minutes of aerobic training at 65% maximum heart rate, and increased to 45-60 minutes of aerobic training at 80% of maximum heart rate. The full workout program included 45-60 minutes of aerobic training 3-4 times/week, while resistance training started with one set of weights corresponding to 60% of the maximum weight, eventually reaching the use of two sets of weights corresponding to 80% of the maximum weight. The resistance training included leg extensions, leg curls, squats, lateral pull-downs, push-ups, shoulder presses, elbow flexions, triceps extensions, and bent leg sit-ups. PA group participants received basic health-promoting guidelines for achieving a healthy diet.

#### Outline of dietary and PA interventions

|                                   | Healthy dietary guidance                                                                                                                   | Mediterranean diet                                                                    | Green Mediterranean diet                                                                                                                      |
|-----------------------------------|--------------------------------------------------------------------------------------------------------------------------------------------|---------------------------------------------------------------------------------------|-----------------------------------------------------------------------------------------------------------------------------------------------|
| Physical activity                 | 18-months free gym membership, 18-months PA education sessions<br>45-60 minutes of aerobic training + resistance training, 3-4 times/week. |                                                                                       |                                                                                                                                               |
| Lifestyle group sessions          | 18-months group sessions in the workplace, weekly for the first month, and monthly thereafter                                              |                                                                                       |                                                                                                                                               |
| General dietary guidance          | Limit dietary cholesterol, trans-fat, saturated-fat, sugars, and salt and increase intake of vegetables                                    |                                                                                       |                                                                                                                                               |
| Energy, kcal/day                  | Guidelines for a healthy Mediterranean diet with no specific recipes or calorie restriction                                                | 1500-1800kcal/day for men, 1200-1400kcal/day for women                                |                                                                                                                                               |
| Total fat, % of daily consumption |                                                                                                                                            | ~40% mainly PUFA and MUFA                                                             |                                                                                                                                               |
| Carbohydrates, gr/day             |                                                                                                                                            | Less than 40gr/day in the first 2 months with increased gradual intake up to 80gr/day |                                                                                                                                               |
| Specific recommendations          |                                                                                                                                            | Avoid red and processed meats. Reduced poultry intake.                                |                                                                                                                                               |
| Polyphenols, mg/day               |                                                                                                                                            | +440 mg/day [source: provided walnuts (28g/day)]                                      | +1240 mg/day [source: provided walnuts (28g/day), green tea (4 cups/day), <i>Wolffia globosa</i> duckweed (Mankai) shake (100g frozen cubes)] |
| Specific recommendations          |                                                                                                                                            |                                                                                       |                                                                                                                                               |

#### Supplementary 5. aFMT and placebo capsules processing

Capsules processing was carried out under aerobic conditions. A fecal suspension was generated in normal saline without preservatives using a commercial blender. Materials were sequentially sieved to remove particulate material. The final slurry was concentrated by centrifugation and resuspended in saline at 10% of the volume of the initial sample with 20% glycerol added as a bacterial cryoprotectant. Fecal matter suspension was pipetted into size 0 capsules (650 µL), which were closed and secondarily sealed in size 00 acid-resistant hypromellose capsules (DRCaps, Capsugel). Each sample was processed separately, and a dose of 100 capsules containing sieved, concentrated material, was derived from the fecal matter. Placebo capsules consisted of agarose in normal saline/glycerol (the same vehicle as in aFMT capsules).

## **Supplementary 6. Blood sample analysis**

Serum levels of total cholesterol (TC; CV, 1.3%), low-density-lipoprotein (LDL) cholesterol were determined enzymatically with a Cobas 6000 automatic analyzer (Roche). Plasma insulin levels were measured with the use of an enzymatic immunometric assay [Immulite automated analyzer, Diagnostic Products, coefficient of variation (CV)=2.5%].

Plasma levels of high-sensitivity C-reactive protein were measured by ELISA (DiaMed; CV, 1.9%). Plasma leptin levels were assessed by ELISA (Mediagnost), with a coefficient of variation of 2.4%.

## **Supplementary 7. Metagenomics analysis BoosterShot pipeline**

### **DNA Extraction**

Samples were extracted using MO Bio PowerFecal (Qiagen) automated for high throughput on QiaCube (Qiagen), with bead beating in 0.1mm glass bead plates.

### **DNA Quantification**

Samples were quantified with Qiant-iT Picogreen dsDNA Assay (Invitrogen).

### **Library Preparation & Sequencing**

Libraries were prepared with a procedure adapted from the Nextera Library Prep kit (Illumina).

Libraries were sequenced on an Illumina NextSeq using single-end 1 x 145 reads with a NextSeq 500/550 High Output v2 kit (Illumina).

### **Sequence Quality Control**

DNA sequences were filtered to remove low quality (Q-Score < 20) reads, and for length (< 50), and adapter sequences were trimmed using cutadapt. Fastq files were converted a single fasta using shi7.

### **OTU Picking**

DNA sequences were aligned to a curated database containing all representative genomes in RefSeq for bacteria with additional manually curated strains. Alignments were made at 98% identity against all reference genomes. Each input sequence was compared to each reference sequence in CoreBiome's Venti database using full gapped alignment with Burst. Ties were broken by minimizing the overall number of unique gene hits. For taxonomy assignment, each input sequence was assigned the lowest common ancestor that was consistent across at least 80% of all reference sequences tied for best hit. The number of counts for each taxon was then normalized to the average genome length. Species accounting for less  $1 \times 10^{-6}$  of all species-level markers were discarded. Samples with fewer than 1,000 sequences were also discarded. The normalized and filtered tables were used for all downstream analyses.

### **Functional Genome Content**

Functional groups were observed directly using Kyoto Encyclopedia of Genes and Genome Orthology groups (KEGG KOs) by alignment against a gene database derived from the strain database used above.

## **Supplementary 8. 16s rRNA sequencing pipeline**

### **DNA Extraction**

Fecal microbiota DNA was extracted using QIAamp PowerFecal DNA Kit (Qiagen) and a FastPrep-24™ bead beater (MP Biomedicals). DNA quantity and quality was assessed spectrophotometrically by NanoDrop™ (ThermoFisher Scientific).

### **Library Preparation & Sequencing**

For 16S rRNA sequencing amplification of total genomic faecal DNA was carried out using the specific bacterial primer set 341F (5' CCTACGGGNGGCWGCAG 3') and 806R (5' GACTACNVGGGTWTCTAATCC 3') with overhang Illumina adapters, targeting a ~460-bp fragment of the 16S rRNA variable region V3-V4.<sup>2,3</sup>

PCR amplification of each sample was carried out using 25 µl reactions with 0.2 µM of each primer and 12.5 ng template DNA, and employing KAPA HiFi HotStart ReadyMix. PCR amplification was carried out using a GeneAmp PCR System 9700 (Thermo Fisher Scientific) with

the following steps: one cycle at 94°C for 5 minutes, 30 cycles at 95°C for 30 seconds, 55°C for 30 seconds, 72°C for 30 seconds and one final elongation step at 72°C for 5 minutes. The PCR products were checked on 1.5% agarose gel and cleaned from free primers and primer dimer using the Agencourt AMPure XP system (Beckman Coulter, Brea, CA, USA) following the manufacturer's instructions. Subsequently dual indices and Illumina sequencing adapters Nextera XT Index Primer (Illumina) were attached by 7 cycles PCR (16S Metagenomic Sequencing Library Preparation, Illumina).

The final libraries were quantified using the Quant-IT PicoGreen dsDNA assay kit (Thermo Fisher Scientific) by the Synergy2 microplate reader (Biotek), then libraries were pooled in an equimolar way and analysed on a Tytestation 2200 platform (Agilent Technologies, Santa Clara, CA, USA). Barcoded library were sequenced on Illumina® MiSeq (PE300) platform (MiSeq Control Software 2.0.5 and Real-Time Analysis software 1.16.18). Sequences with expected error rate >1.5% were removed from analysis.

#### **Mice study extraction, amplification and sequencing of fecal samples**

DNA was extracted from all fecal samples by PureLink Microbiome DNA Purification Kit (Invitrogen, Carlsbad, CA). The V4 region of the bacterial 16S rRNA gene was amplified by polymerase chain reaction (PCR) using the 515F (AATGATACGGCGACCACCGAGATCTACACGCT) barcoded and 806R (TATGGTAATTGTGTGYCAGCMGCCGCGGTAA) primers. A reaction containing a final concentration of 0.04% of each primer and 0.5% of PrimeSTAR® Max DNA Polymerase (Takara, Mountain View, CA) 50µl total volume. PCR reactions were carried out by 35 cycles of denaturation (95°C), annealing (55°C) and extension (72°C), with final elongation at 72°C. PCR products were purified using AMPure magnetic beads (Beckman Coulter, Indianapolis, IN) and quantified using dsDNA fluorescence quantification assay kit (DeNovix Inc, Wilmington, Delaware). Samples were then pooled at equal amounts of 50ng, loaded on 2% agarose E-Gel (Thermo Fisher, Waltham, MA), purified and sent for sequencing using the Illumina MiSeq platform (Genomic center, Azrieli Faculty of Medicine, BIU, Israel).

#### **Supplementary 9. Multiple imputations for missing follow-up data**

We performed intention-to-treat analyses, including all 90 participants, by imputing missing follow-up data of a single participant on the 14-month timepoint of both primary outcomes by the multiple imputation technique.<sup>4</sup>

The imputation was done by the R package "mice"<sup>5</sup>, wherein the following predictors were used in the imputation model: age, sex, baseline weight and initial 6-months weight-loss.

**Table S1: Chronic Pharmacotherapy of the participants at baseline**

| Treatment                        | All subjects |          |     | Healthy dietary guidance group |          |     | Mediterranean diet |          |     | Green Mediterranean diet |          |     |
|----------------------------------|--------------|----------|-----|--------------------------------|----------|-----|--------------------|----------|-----|--------------------------|----------|-----|
|                                  | aFMT         | Placebo  | Pv  | aFMT                           | Placebo  | Pv  | aFMT               | Placebo  | Pv  | aFMT                     | Placebo  | Pv  |
| Subjects - no.                   | 44           | 46       |     | 8                              | 8        |     | 17                 | 18       |     | 19                       | 20       |     |
| Oral anti-hyperglycemic- no. (%) | 3 (6.8)      | 3 (6.5)  | 1   | 1 (12.5)                       | 0 (0.0)  | 1   | 0 (0.0)            | 1 (5.6)  | 1   | 2 (10.5)                 | 2 (10.0) | 1   |
| Exogenous insulin- no. (%)       | 1 (2.3)      | 1 (2.2)  | 1   | 0 (0)                          | 0 (0)    | 1   | 0 (0)              | 0 (0)    | 1   | 1 (5.3)                  | 1 (5.0)  | 1   |
| Anti-hypertensive- no.(%)        | 10 (22.7)    | 9 (19.6) | .91 | 3 (37.5)                       | 0 (0.0)  | .2  | 2 (11.8)           | 4 (22.2) | .71 | 5 (26.3)                 | 5 (25.0) | 1   |
| Cholesterol lowering- no. (%)    | 6 (13.6)     | 8 (17.4) | .84 | 2 (25.0)                       | 1 (12.5) | 1   | 1 (5.9)            | 1 (5.6)  | 1   | 3 (15.8)                 | 6 (30.0) | .5  |
| Anti-platelet- no. (%)           | 6 (13.6)     | 2 (4.3)  | .24 | 2 (25.0)                       | 0 (0.0)  | .45 | 1 (5.9)            | 0 (0.0)  | .98 | 3 (15.8)                 | 2 (10.0) | .95 |

**Table S2: Characteristics of the study population at time 14-month**

| Treatment                         | All subjects   |                |     | Healthy dietary guidance group |              |     | Mediterranean diet |                |     | Green Mediterranean diet |                |     |
|-----------------------------------|----------------|----------------|-----|--------------------------------|--------------|-----|--------------------|----------------|-----|--------------------------|----------------|-----|
|                                   | aFMT           | Placebo        | Pv  | aFMT                           | Placebo      | Pv  | aFMT               | Placebo        | Pv  | aFMT                     | Placebo        | Pv  |
| Subjects - no.                    | 44             | 46             |     | 8                              | 8            |     | 17                 | 18             |     | 19                       | 20             |     |
| Body mass index                   | 28.92 (3.12)   | 29.53 (4.21)   | .82 | 29.11 (3.51)                   | 28.31 (1.72) | .73 | 29.23 (3.69)       | 29.75 (4.96)   | .77 | 28.55 (2.46)             | 29.79 (4.16)   | .42 |
| Waist circumference- cm           | 101.45 (7.85)  | 102.25 (10.84) | .94 | 100.00 (9.62)                  | 97.00 (4.62) | .86 | 102.47 (8.66)      | 103.94 (11.80) | .84 | 101.16 (6.52)            | 102.58 (11.33) | .75 |
| Weight- Kg                        | 87.69 (12.58)  | 86.92 (14.25)  | .80 | 86.15 (14.90)                  | 79.27 (8.57) | .25 | 87.99 (13.48)      | 89.63 (15.78)  | .70 | 88.07 (11.35)            | 87.18 (13.98)  | .91 |
| Fasting plasma glucose- mg/dl     | 103.57 (14.69) | 99.78 (9.18)   | .29 | 104.18 (17.13)                 | 98.48 (6.74) | .73 | 99.28 (7.41)       | 98.89 (10.65)  | .27 | 107.17 (18.05)           | 101.17 (8.80)  | .52 |
| Fasting plasma insulin- microU/ml | 10.16 (4.61)   | 11.54 (7.05)   | .56 | 10.95 (4.40)                   | 11.34 (7.38) | .83 | 10.06 (3.84)       | 10.89 (5.91)   | .97 | 9.92 (5.46)              | 12.21 (8.08)   | .42 |
| HOMA-IR                           | 2.55 (1.29)    | 2.88 (1.86)    | .69 | 2.53 (1.06)                    | 2.83 (1.98)  | .73 | 2.46 (0.93)        | 2.67 (1.55)    | 1   | 2.65 (1.65)              | 3.11 (2.14)    | .63 |

Values are presented as means (standard deviation) for continues variables and total number (percent) for categorical variables. No significant differences were observed between placebo or aFMT group in the measured baseline characteristics, overall and across lifestyle interventions. HOMA-IR denotes homeostasis model assessment of insulin resistance

**Table S3: Adherence to diet at time 6-month; adherence to physical activity at baseline and time 6-month**

|                                                      | Healthy dietary guidance | Mediterranean diet | Green Mediterranean diet | Pv    |
|------------------------------------------------------|--------------------------|--------------------|--------------------------|-------|
| <b>Adherence to dietary intervention at 6-months</b> |                          |                    |                          |       |
| % Carbohydrates intake                               | 45.99 (8.13)             | 32.53 (6.88)       | 37.19 (8.53)             | <.001 |
| % Protein intake                                     | 18.97 (3.58)             | 27.02 (4.23)       | 23.21 (4.65)             | <.001 |
| % Fat intake                                         | 36.41 (5.13)             | 41.15 (6.27)       | 40.76 (7.25)             | .1    |
| <b>Adherence to physical activity intervention</b>   |                          |                    |                          |       |
| Baseline METs/week                                   | 38.97 (48.68)            | 42.08 (18.62)      | 35.08 (22.98)            | 0.723 |
| 6-month METs/week                                    | 56.72 (47.17)            | 72.67 (41.39)      | 51.36 (33.36)            | .212  |

Values are presented as means (standard deviation). Proportional macronutrient intake (6-months timepoint) and metabolic equivalents (METs; baseline and 6-months timepoint) across lifestyle intervention group. METs unit are defined as the ratio of work metabolic rate to the standard resting metabolic rate.

**Table S4: Adherence to diet and physical activity, across lifestyle intervention arms and treatment groups at the end of the trial**

| Treatment              | Healthy dietary guidance |               |      | Mediterranean diet |               |      | Green Mediterranean diet |               |      |
|------------------------|--------------------------|---------------|------|--------------------|---------------|------|--------------------------|---------------|------|
|                        | aFMT                     | Placebo       | Pv   | aFMT               | Placebo       | Pv   | aFMT                     | Placebo       | Pv   |
| % Carbohydrates intake | 43.90 (6.01)             | 44.62 (2.05)  | .855 | 38.01 (6.34)       | 36.94 (8.47)  | .727 | 41.85 (6.55)             | 39.13 (8.26)  | .447 |
| % Protein intake       | 19.99 (1.76)             | 20.59 (1.14)  | .584 | 23.91 (3.14)       | 22.98 (4.79)  | .6   | 20.86 (2.23)             | 20.82 (3.45)  | .861 |
| % Fat intake           | 37.22 (5.09)             | 35.44 (2.17)  | .715 | 38.98 (4.59)       | 41.63 (5.46)  | .116 | 38.74 (5.58)             | 40.48 (5.67)  | .482 |
| METs/week              | 67.58 (49.77)            | 55.91 (54.07) | .624 | 46.27 (26.98)      | 48.69 (34.80) | .93  | 36.14 (31.75)            | 33.86 (27.19) | .804 |

Values are presented as means (standard deviation). Proportional macronutrient intake and metabolic equivalents (METs) across lifestyle intervention group and aFMT treatment at the end of the trial. METs unit are defined as the ratio of work metabolic rate to the standard resting metabolic rate.



Figure S1: aFMT effect on 6-14 months changes in HOMA-IR, across lifestyle intervention

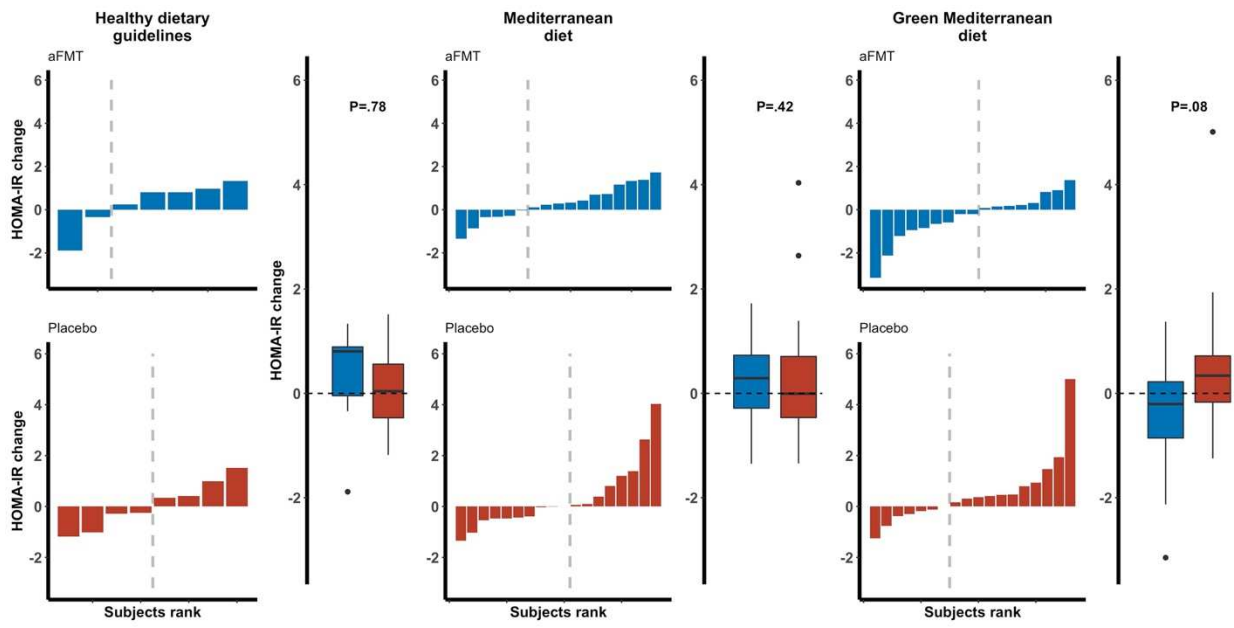

**Figure S2: 0 to 6-months taxa changes across lifestyle intervention arms**

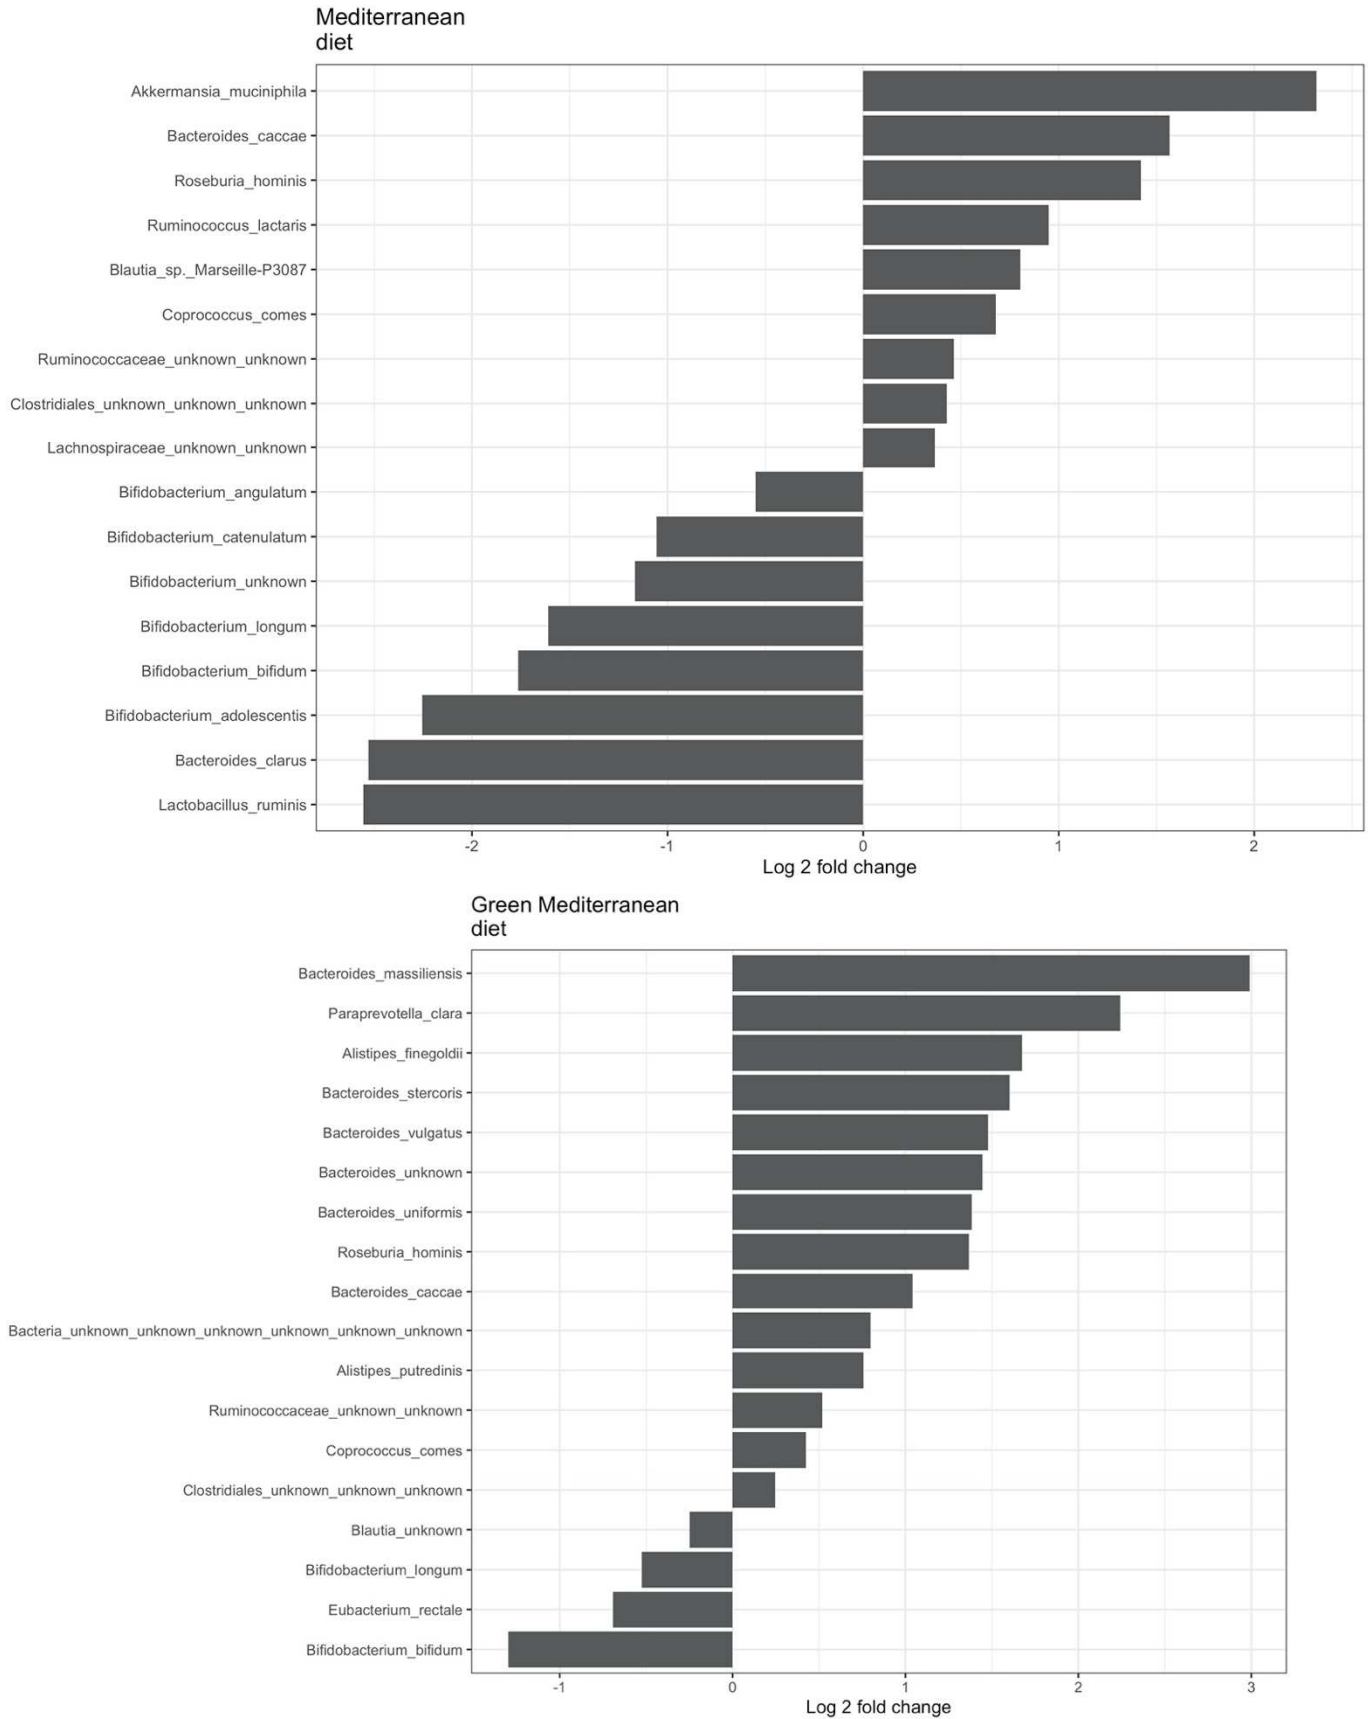

**Figure S2: 0 to 6-months taxa changes across lifestyle intervention arms**

Species that were significantly changed by weight loss, across lifestyle intervention groups. Values represents log 2 fold change from baseline, by bacteria. No significant changes were observed among the Healthy dietary guidance group

**Figure S3: 0 to 6-months KEGG modules changes across lifestyle intervention arms**

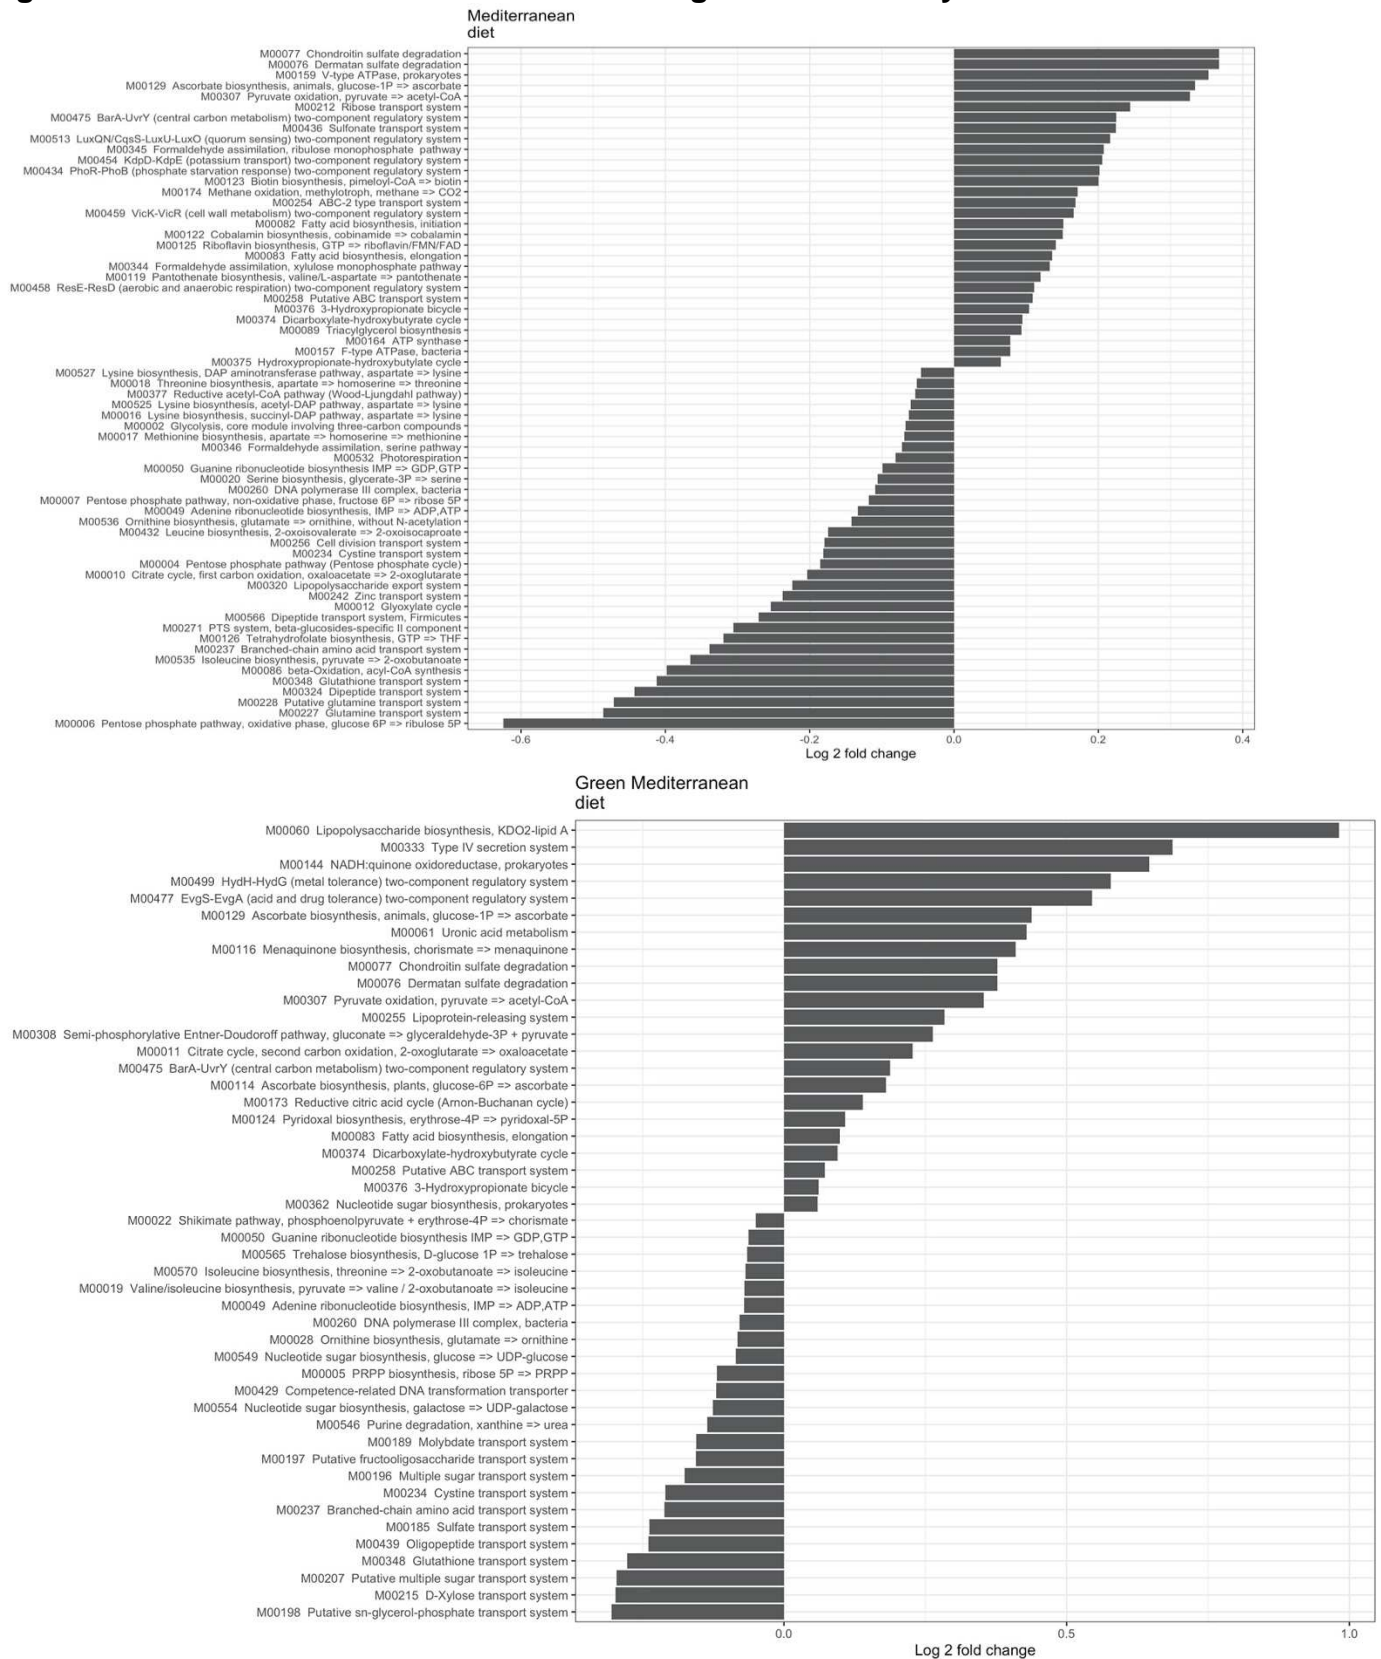

**Figure S3: 0 to 6-months KEGG modules changes across lifestyle intervention arms**

KEGG modules that were significantly changed by weight loss, across lifestyle intervention groups. Values represents log 2 fold change from baseline, by module. No significant changes were observed among the Healthy dietary guidance group.

Figure S4: Shotgun metagenomics processing validation against MetaPhlan2

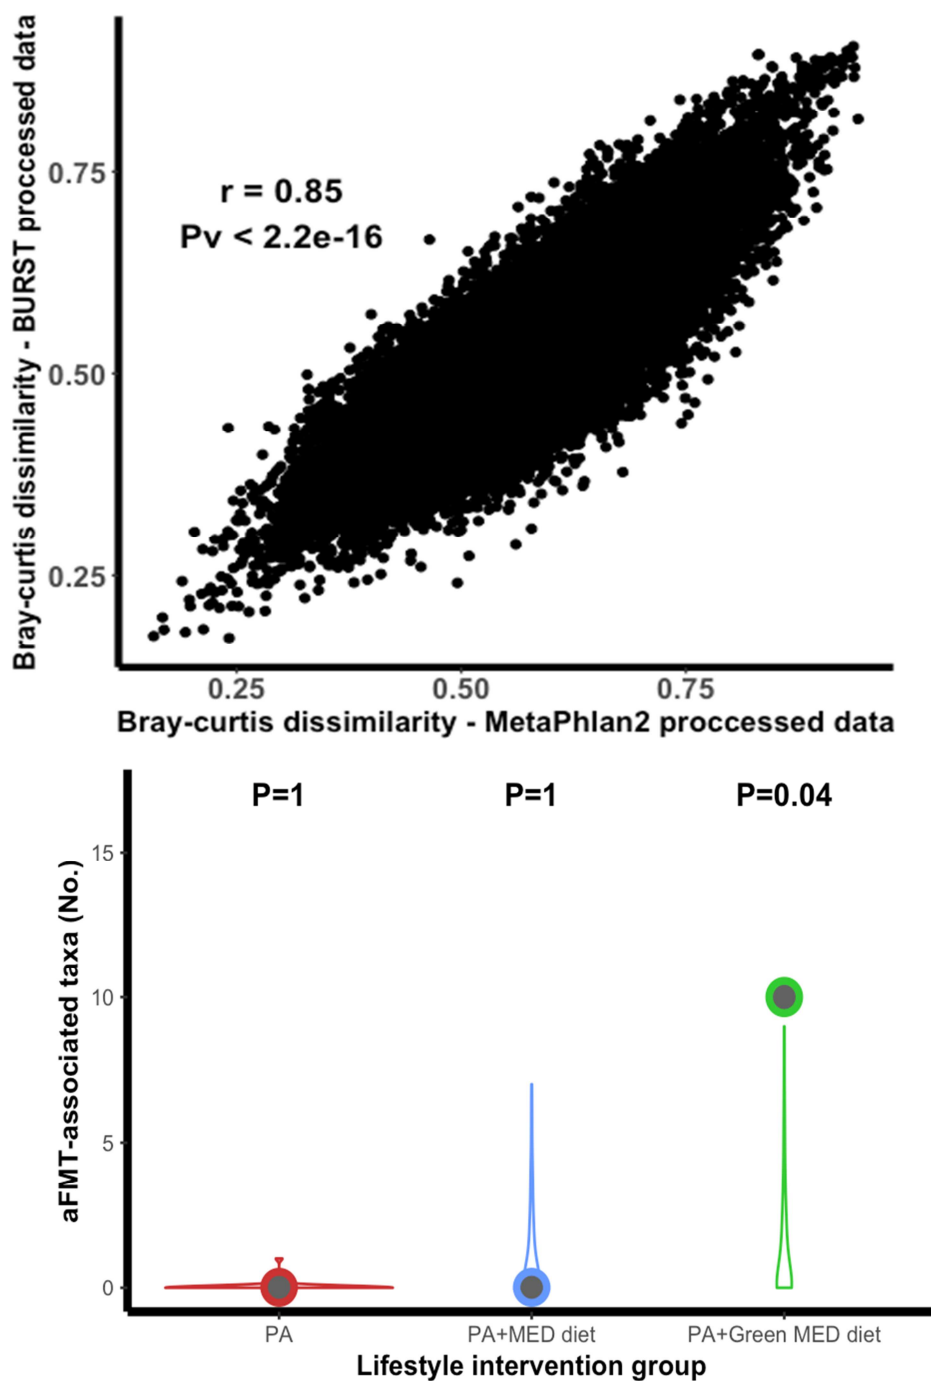

Figure S4: Shotgun metagenomics processing validation against MetaPhlan2

(a) Correlation between pairwise samples dissimilarity, processed by BURST vs. MetaPhlan2, for all possible pairs of sequenced samples. (b) Comparison between the number of observed aFMT-associated taxa, generated by MetaPhlan2, to the number expected by a permuted null model by an iterative randomization ( $n=1000$ ) of sample labeling across group, treatment and time. The gray dot denotes the observed number of taxa in each group, while the violins enclose 95% of the permuted results. P value was calculated as observed/expected.

**Figure S5: Microbiome taxonomic and functional changes – centered-log-transformed data**

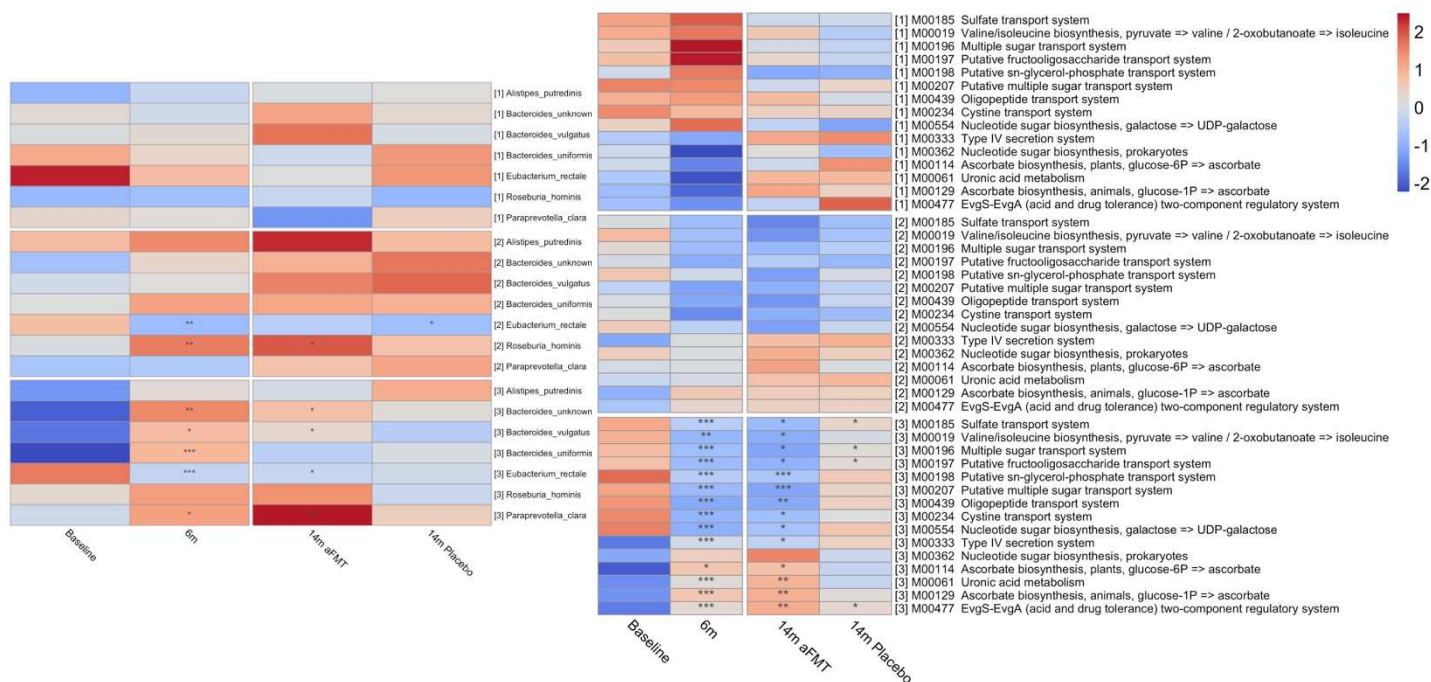

**Figure S5: Microbiome taxonomic and functional changes – centered-log-transformed data**  
Shotgun metagenomics assessed bacteria and metabolic pathways (KEGG modules) after centered log transformation that were significantly changed by weight loss and maintained by the aFMT treatment, across lifestyle intervention groups.

**Figure S6: Microbiome taxonomic and functional changes – excluding subjects with prescribed metformin**

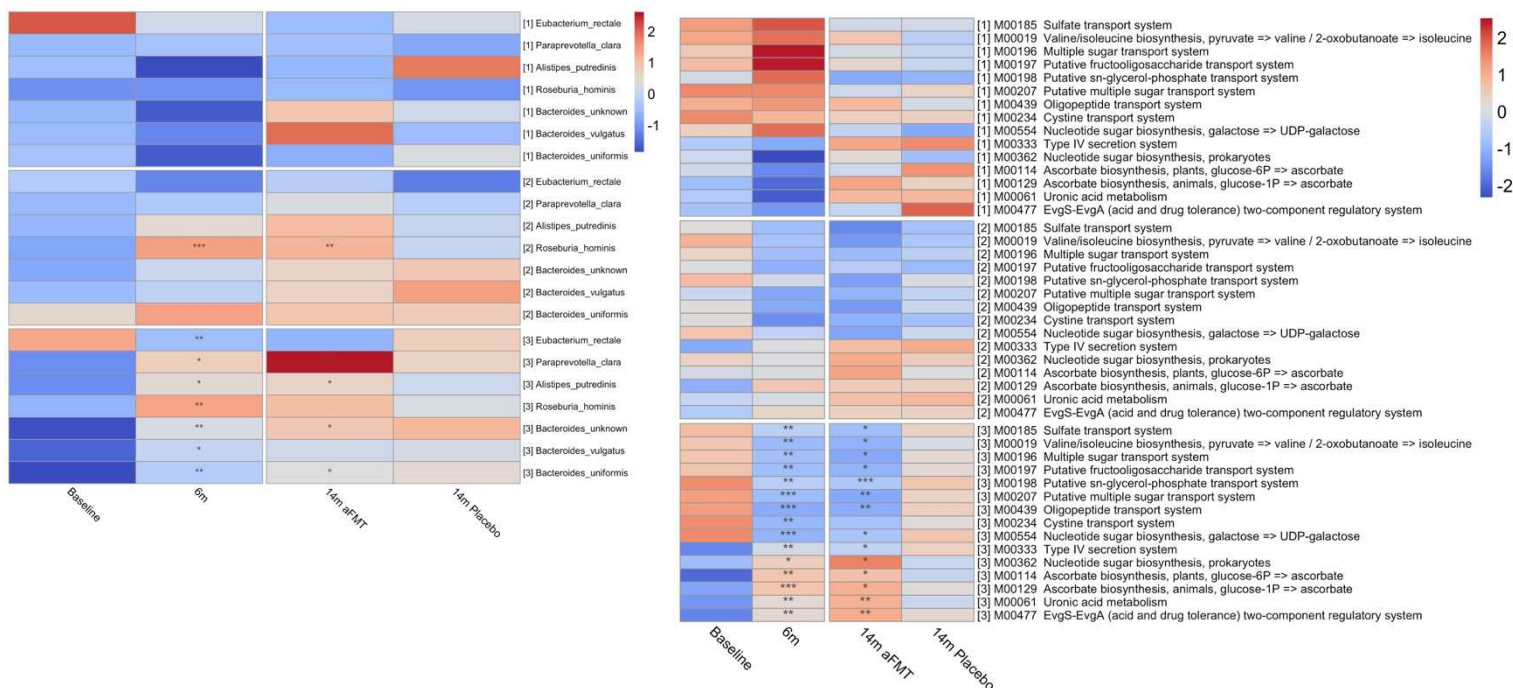

**Figure S6: Microbiome taxonomic and functional changes – excluding subjects with prescribed metformin**  
Shotgun metagenomics assessed bacteria and metabolic pathways (KEGG modules), excluding subject with prescribed metformin, that were significantly changed by weight loss and maintained by the aFMT treatment, across lifestyle intervention groups.
